# Supplementary material
Source: publisher figshare collection journal article supplement (https://sage.figshare.com/ndownloader/files/13569101)
Supplement: Supplementary file 1 [file 13569101]

## Supplemental Figure S1

**A**

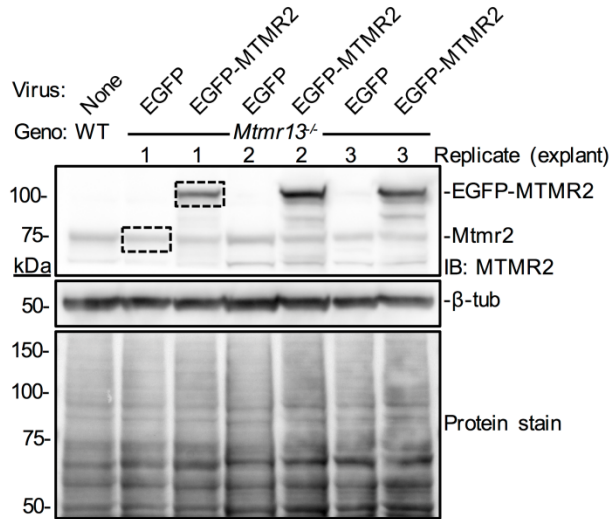

**B**

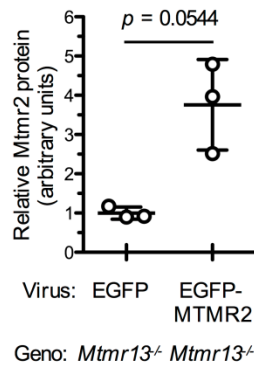

### Supplemental Figure S1. (Relates to Figure 6G)

Expression of EGFP-MTMR2 in myelinating DRG explants at levels similar to those of endogenous Mtmr2. Wild type or *Mtmr13*<sup>-/-</sup> SC-DRG explants were infected with lentiviruses (LV) encoding EGFP or EGFP-MTMR2, or left uninfected. Infection was on day 5 and carried out at an MOI of 15. More than 90% of the Schwann cells in an explant were infected with EGFP or EGFP-MTMR2 under these conditions. At 21 days, protein lysates were prepared.

**(A)** Immunoblot analysis of endogenous Mtmr2 and EGFP-MTMR2 protein levels in SC-DRG

explants after lentivirus infection (20 µg of protein per lane). **(B)** Quantitation of relative Mtmr2 and EGFP-MTMR2 protein levels via immunoblotting (IB) with an anti-MTMR2 antibody. For the LV-EGFP-infected and LV-EGFP-MTMR2-infected explants, the bar graph reports the levels of the endogenous Mtmr2 protein and the EGFP-MTMR2 protein, respectively; for clarity dashed boxes in the MTMR2 immunoblot panel indicate which protein bands were compared. Relative Mtmr2/MTMR2 protein:  $1.000 \pm 0.1532$  for LV-EGFP infected vs.  $3.757 \pm 1.152$  LV-EGFP-MTMR2 infected (arbitrary units);  $p = 0.0544$ ;  $n = 3$  explants for each condition; mean  $\pm$  SD. *Abbreviations:* kDa, kiloDalton; Geno., genotype. Mtmr2 levels were normalized to the  $\beta$ -tubulin signal in the corresponding gel/blot lane. Data were normalized such that the mean value for the wild type sample was 1.
